# Supplementary material
Source: HighWire-hosted journal article supplement (https://heart.bmj.com/content/104/3/192)
Supplement: inline-supplementary-material-1 [file inline-supplementary-material-1.pdf]

Online appendix Figure 1.

TDC  
 PROTOCOL: #####

Blinded DSMB (Data Cut: 02Jan2017) 01JAN2017 11:00  
 Page 1 of 2

Table 10.1.3.1  
 Demographic and Baseline Characteristics (Double-Blind Period)  
 All Patients Randomized Set

|                                          | Number of Subjects (%) |                 |                 |
|------------------------------------------|------------------------|-----------------|-----------------|
|                                          | Placebo<br>(N=15)      | 20 mg<br>(N=22) | 40 mg<br>(N=18) |
| Body Mass Index (kg/m <sup>2</sup> ) (d) |                        |                 |                 |
| N                                        | 15                     | 22              | 18              |
| Mean (SD)                                | 28.79(5.358)           | 33.57(10.209)   | 27.91(5.947)    |
| Median                                   | 28.00                  | 29.70           | 28.50           |
| Minimum, Maximum                         | 20.0,37.3              | 20.0,60.1       | 17.1,43.5       |
| BMI Categories (N[%])                    |                        |                 |                 |
| < 30 kg/m <sup>2</sup>                   | 9 ( 60.0)              | 12 ( 54.5)      | 13 ( 72.2)      |
| >= 30 kg/m <sup>2</sup>                  | 6 ( 40.0)              | 10 ( 45.5)      | 5 ( 27.8)       |
| Smoking Classification (N[%])            |                        |                 |                 |
| Subject has never smoked                 | 5 ( 33.3)              | 12 ( 54.5)      | 8 ( 44.4)       |
| Subject is a current smoker              | 7 ( 46.7)              | 7 ( 31.8)       | 4 ( 22.2)       |
| Subject is an ex-smoker                  | 3 ( 20.0)              | 3 ( 13.6)       | 6 ( 33.3)       |
| Female Reproductive Status (N[%])        |                        |                 |                 |
| Postmenopausal                           | 1 ( 6.7)               | 0               | 0               |
| Surgically Sterile                       | 2 ( 13.3)              | 3 ( 13.6)       | 0               |
| Female of Childbearing Potential         | 4 ( 26.7)              | 7 ( 31.8)       | 4 ( 22.2)       |
| N/A (Subject is Male)                    | 8 ( 53.3)              | 12 ( 54.5)      | 14 ( 77.8)      |

- (a) Age at the date of Informed consent.
- (b) Subject checked more than one race option on case report form.
- (c) Weight measured prior to the first dose of double-blind study drug.
- (d) BMI is calculated from the weight taken prior to the first dose of study drug and height taken as Screening.

Table 10.1.3.1  
 Demographic and Baseline Characteristics (Double-Blind Period)  
 All Patients Randomized Set

|                                          | Number of Subjects (%) |                  |                 |
|------------------------------------------|------------------------|------------------|-----------------|
|                                          | 80 mg<br>(N=15)        | 160 mg<br>(N=13) | Total<br>(N=83) |
| Body Mass Index (kg/m <sup>2</sup> ) (d) |                        |                  |                 |
| N                                        | 15                     | 13               | 83              |
| Mean (SD)                                | 31.90 (11.613)         | 26.82 (5.086)    | 30.12 (8.523)   |
| Median                                   | 28.40                  | 25.80            | 28.50           |
| Minimum, Maximum                         | 19.6, 61.0             | 19.0, 37.6       | 17.1, 61.0      |
| BMI Categories (N[%])                    |                        |                  |                 |
| < 30 kg/m <sup>2</sup>                   | 9 ( 60.0)              | 10 ( 76.9)       | 53 ( 63.9)      |
| >= 30 kg/m <sup>2</sup>                  | 6 ( 40.0)              | 3 ( 23.1)        | 30 ( 36.1)      |
| Smoking Classification (N[%])            |                        |                  |                 |
| Subject has never smoked                 | 5 ( 33.3)              | 5 ( 38.5)        | 35 ( 42.2)      |
| Subject is a current smoker              | 4 ( 26.7)              | 6 ( 46.2)        | 28 ( 33.7)      |
| Subject is an ex-smoker                  | 6 ( 40.0)              | 2 ( 15.4)        | 20 ( 24.1)      |
| Female Reproductive Status (N[%])        |                        |                  |                 |
| Postmenopausal                           | 0                      | 0                | 1 ( 1.2)        |
| Surgically Sterile                       | 1 ( 6.7)               | 0                | 6 ( 7.2)        |
| Female of Childbearing Potential         | 2 ( 13.3)              | 4 ( 30.8)        | 21 ( 25.3)      |
| N/A (Subject is Male)                    | 12 ( 80.0)             | 9 ( 69.2)        | 55 ( 66.3)      |

- (a) Age at the date of Informed consent.
- (b) Subject checked more than one race option on case report form.
- (c) Weight measured prior to the first dose of double-blind study drug.
- (d) BMI is calculated from the weight taken prior to the first dose of study drug and height taken as Screening.
